# Supplementary material for: How is gut microbiome of patients with familial adenomatous polyposis different from healthy people?
Source: PubMed Central journal article supplement — Medicine (Baltimore). 2022 Dec 9;101(49):e32194. doi: 10.1097/MD.0000000000032194 (PMC9750518; doi:10.1097/md.0000000000032194), 2022-12-09
Supplement: medi-101-e32194-s001.pdf [file medi-101-e32194-s001.pdf]

**Supplementary Table 1. Characteristics of healthy volunteers**

| No. | Sex/age | BMI<br>(kg/m <sup>2</sup> ) | ABO type | Alcohol history | Current smoker | Co-morbidities | Family history<br>(FAP) |
|-----|---------|-----------------------------|----------|-----------------|----------------|----------------|-------------------------|
| H1  | M/29    | 24.5                        | A        | Yes             | No             | None           | None                    |
| H2  | F/25    | 20.6                        | A        | No              | No             | None           | None                    |
| H3  | M/42    | 27.8                        | B        | No              | No             | None           | None                    |
| H4  | F/41    | 21.6                        | B        | No              | No             | None           | None                    |
| H5  | M/53    |                             |          | Yes             | Yes            | None           | None                    |
| H6  | F/31    | 19.0                        | AB       | No              | No             | None           | None                    |
| H7  | F/58    | 30.0                        | B        | No              | No             | None           | None                    |
| H8  | F/42    | 19.3                        | B        | No              | No             | None           | None                    |
| H9  | F/41    | 23.0                        | B        | No              | No             | None           | None                    |
| H10 | M/47    | 22.5                        | A        | Yes             | No             | None           | None                    |

BMI, body mass index; FAP, familial adenomatous polyposis
