# Supplementary material for: How is gut microbiome of patients with familial adenomatous polyposis different from healthy people?
Source: PubMed Central journal article supplement — Medicine (Baltimore). 2022 Dec 9;101(49):e32194. doi: 10.1097/MD.0000000000032194 (PMC9750518; doi:10.1097/md.0000000000032194), 2022-12-09

**Supplementary Figure 1.** The individual Krona plots of patients with familial adenomatous polyposis and healthy people show all taxonomic levels based on the RDP taxonomy starting from superkingdom to genus level and associated abundance based on the number of identified spectra summed. A number indicates an individual participant.

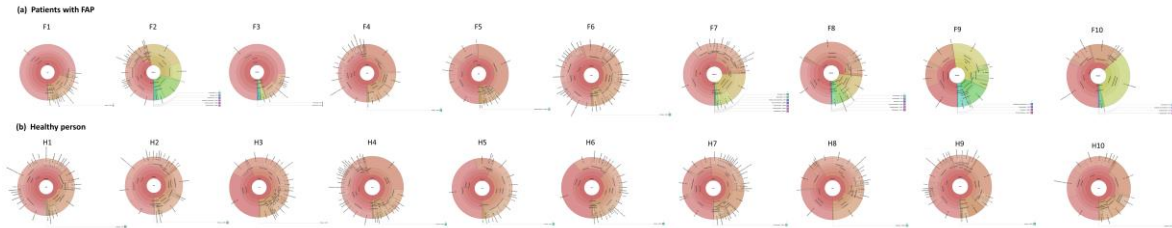

Supplement: medi-101-e32194-s002.pdf [file medi-101-e32194-s002.pdf]
